# Supplementary material for: Gobichelin A and B: mixed-ligandsiderophores discovered using proteomics
Source: Royal Society of Chemistry journal article supplement (doi:10.1039/c2md20232h), 2012-09-25
Supplement: c2md20232h.pdf [file c2md20232h.pdf]

### Electronic Supplementary Information

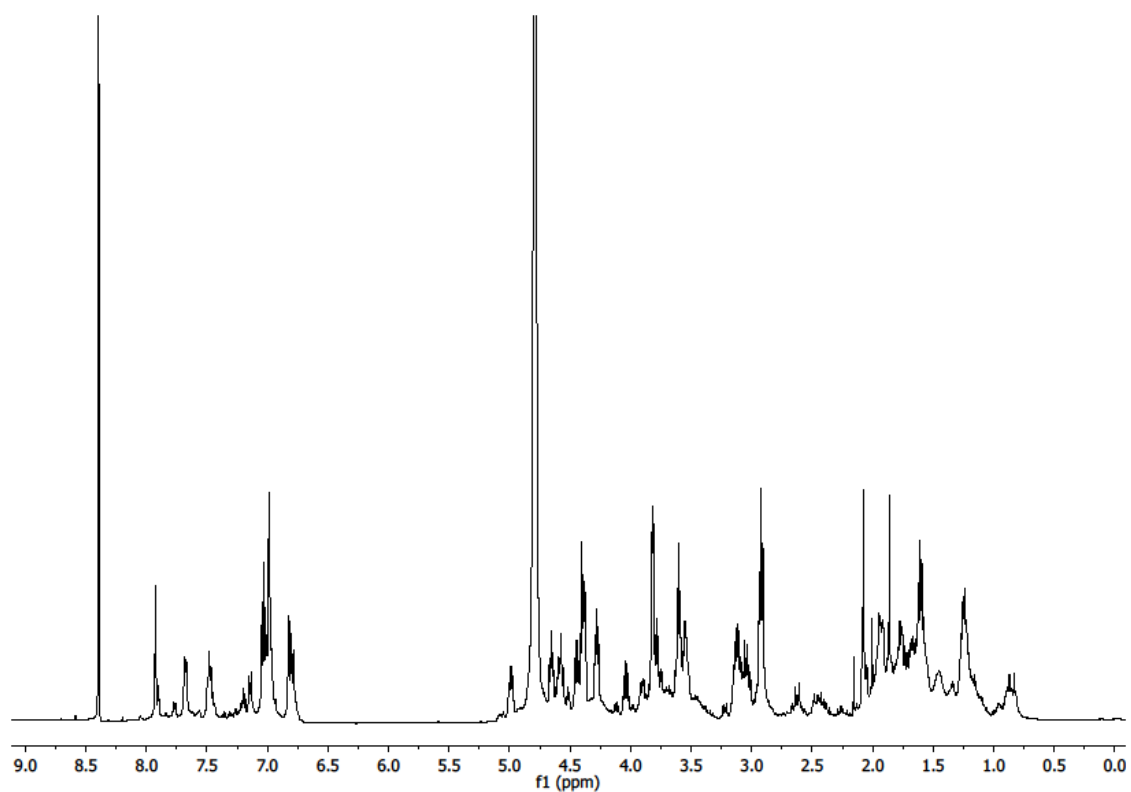

**Supplementary Figure 1.**  $^1\text{H}$  NMR spectrum of gobichelin A in  $\text{D}_2\text{O}$ .

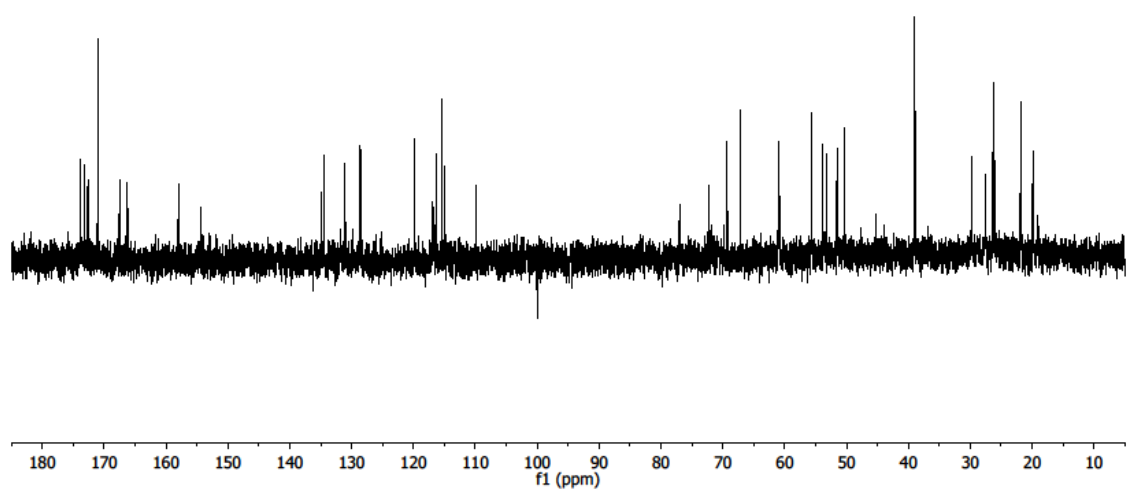

**Supplementary Figure 2.**  $^{13}\text{C}$  NMR spectrum of gobichelin A in  $\text{D}_2\text{O}$ .

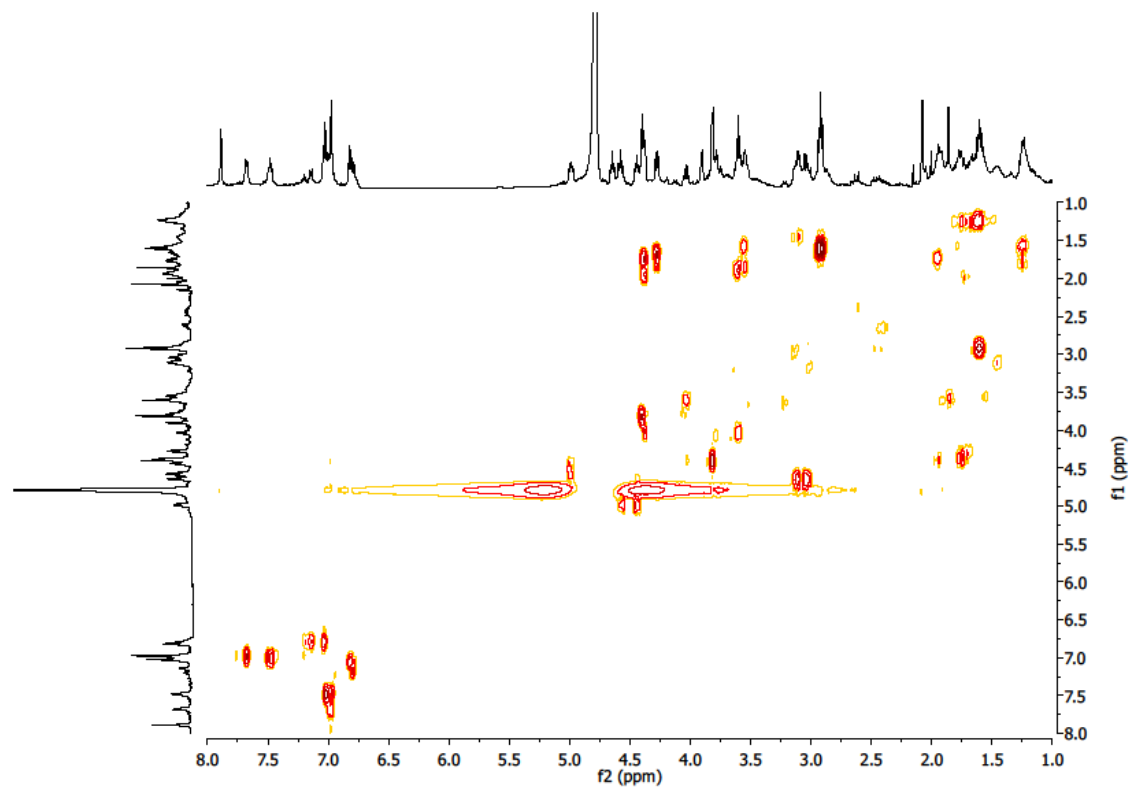

**Supplementary Figure 3.** COSY spectrum of gobichelin A in D<sub>2</sub>O.

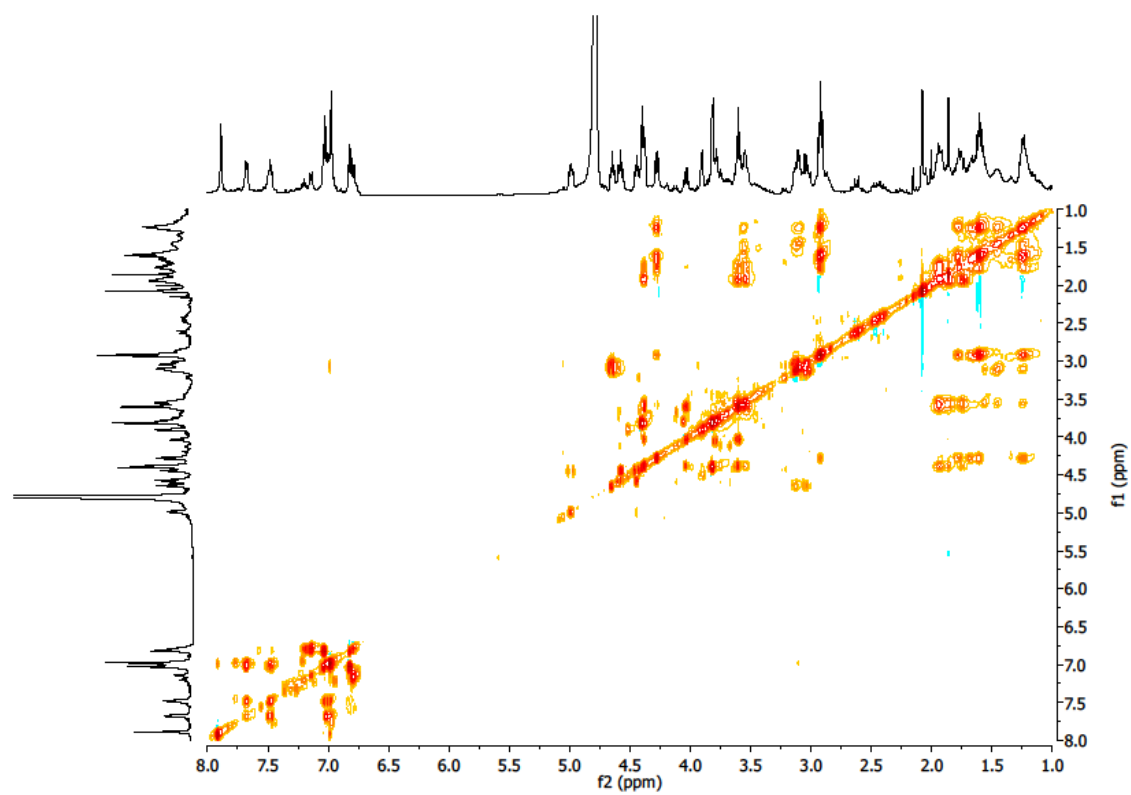

**Supplementary Figure 4.** TOCSY spectrum of gobichelin A in D<sub>2</sub>O.

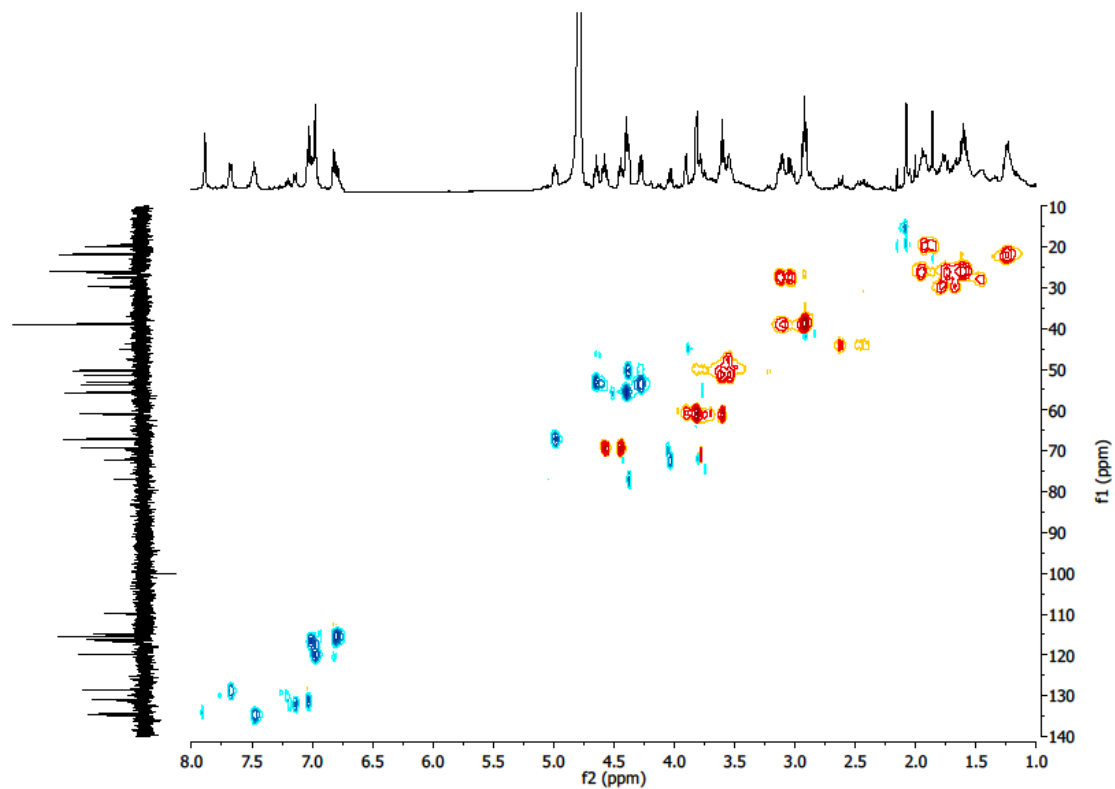

**Supplementary Figure 5.** HSQC spectrum of gobichelin A in D<sub>2</sub>O

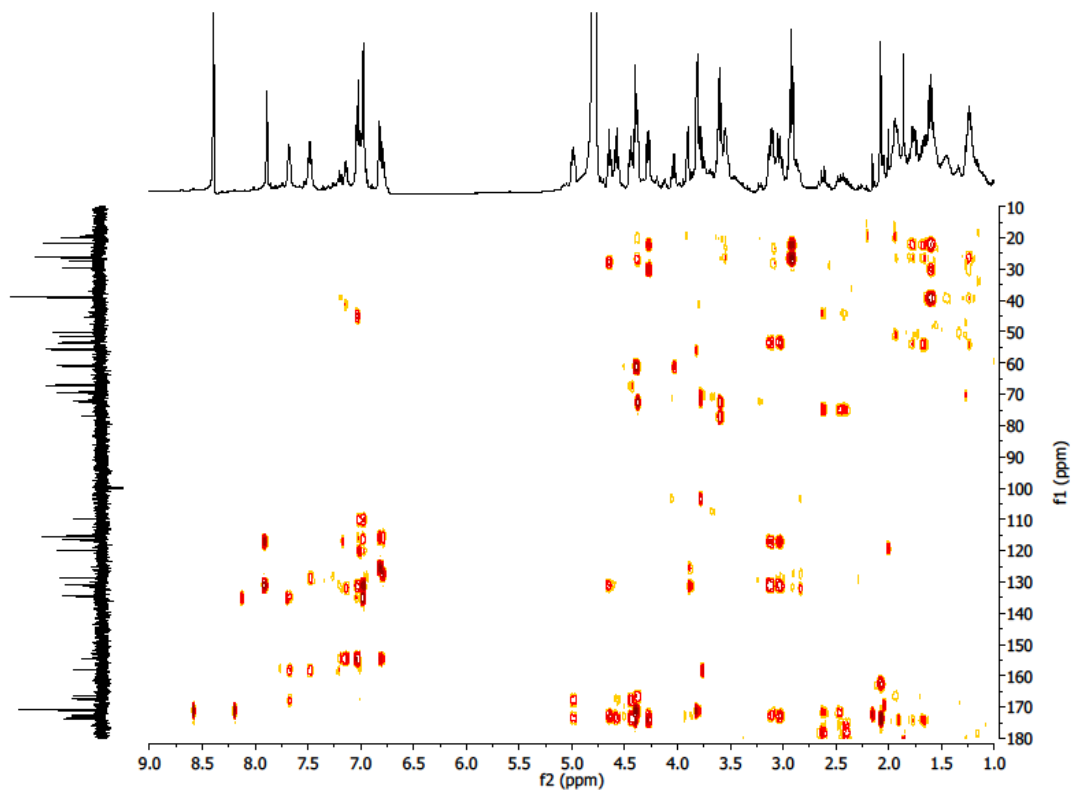

**Supplementary Figure 6.** HMBC NMR spectrum of gobichelin A in D<sub>2</sub>O

**Supplementary Table 1.** Annotations of the gobichelin gene cluster.

| Gene | Predicted Function                                  | Length (aa) | Sequence similarity                                                   | Identity/similarity |
|------|-----------------------------------------------------|-------------|-----------------------------------------------------------------------|---------------------|
| A    | TetR transcriptional regulator                      | 153         | YP_004965285<br><i>Streptomyces bingchenggensis</i><br>BCW-1          | 52/64               |
| B    | NH <sub>3</sub> dependent NAD <sup>+</sup> synthase | 277         | ZP_07288305<br><i>streptomyces sp.C</i>                               | 92/96               |
| C    | hypothetical protein                                | 218         | ZP_09180682<br><i>Streptomyces sp. S4</i>                             | 80/89               |
| D    | acetyltransferase                                   | 156         | ZP_06775522<br><i>Streptomyces clavuligerus</i> ATCC<br>27064         | 51/65               |
| E    | isochorismatase                                     | 219         | YP_004801102<br><i>Streptomyces sp. SirexAA-E</i>                     | 72/81               |
| F    | putative ORF                                        | 99          | No significant similarity to<br>proteins in nr                        |                     |
| G    | amidinotransferase                                  | 253         | ZP_04713053<br><i>Streptomyces roseosporus</i> NRRL<br>11379          | 80/88               |
| H    | salicylate synthase                                 | 533         | ZP-06417730<br><i>Frankia sp. EUN1f</i>                               | 44/53               |
| I    | type II thioesterase                                | 261         | ref YP_481508.1<br><i>Frankia sp. CcI3</i>                            | 45/59               |
| J    | NRPS (T-Cy-A-T)                                     | 1181        | ref ZP_07278495.1<br><i>Streptomyces sp. AA4</i>                      | 58/69               |
| K    | 2,3-dihydroxybenzoate-AMP ligase                    | 578         | ref YP_001104901.1<br><i>Saccharopolyspora erythraea</i><br>NRRL 2338 | 62/72               |
| L    | MbtH                                                | 81          | emb CAE53354.1<br><i>Actinoplanes teichomyceticus</i>                 | 73/80               |
| M    | iron siderophore uptake ABC system                  | 354         | ref YP_075115.1<br><i>Symbiobacterium thermophilum</i><br>IAM 1486    | 45/65               |
| N    | ABC transporter                                     | 279         | ref YP_003339144.1<br><i>Streptosporangium roseum</i> DSM<br>43021    | 70/81               |
| O    | ABC transporter                                     | 362         | ref ZP_08235100.1<br><i>Streptomyces griseus</i> XylebKG-1            | 56/69               |
| P    | iron siderophore transporter                        | 278         | ref ZP_08806318.1<br><i>Streptomyces zinciresistens</i> K42           | 64/77               |
| Q    | enterobactin transporter                            | 331         | ref ZP_10053435.1                                                     | 46/56               |

|   |                             |      |                                                                           |       |
|---|-----------------------------|------|---------------------------------------------------------------------------|-------|
| R | NRPS (C-A-T-C-A-T-E)        | 2583 | ref ZP_06575792.1<br>pstC<br><i>Streptomyces ghanaensis</i> ATCC<br>14672 | 48/59 |
| S | NRPS (C-A-T-C-A-T-TE)       | 2277 | ref YP_005057340.1<br><i>Granulicella mallensis</i><br>MP5ACTX8           | 50/64 |
| T | L-ornithine 5-monooxygenase | 456  | ref ZP_06712113.1<br><i>Streptomyces sp.</i> e14                          | 67/77 |

**Supplementary Table 2.** Peptide identifications matching known NRPS proteins from *Streptomyces sp.* NRRL F-4415.

| Peptide Sequence      | Protein Description                                                                                  | Accession #  |
|-----------------------|------------------------------------------------------------------------------------------------------|--------------|
| LGAGDDIPIGTPVAGR      | daptomycin biosynthetic protein subunit<br>[ <i>Streptomyces filamentosus</i> ]                      | AAB96629     |
| AALGDVVMRHEALR        | putative NRPS [ <i>Streptomyces bingchenggensis</i><br>BCW-1]                                        | ADI09919     |
| GVVVPHSAIVNR          | amino acid adenylation domain protein [ <i>Acidovorax</i><br><i>avenae subsp. avenae</i> ATCC 19860] | ADX48474     |
| WTADGVIEYLGR          | non-ribosomal peptide synthetase [ <i>Streptomyces</i><br><i>noursei</i> ]                           | BAH68405     |
| ETDLAAYAHQDLPFER      | pstC [ <i>Actinoplanes friuliensis</i> ]                                                             | CAM56770     |
| TVGWFTTVHPVR          | putative non-ribosomal peptide synthetase<br>[ <i>Streptomyces collinus</i> ]                        | CAN89661     |
| LRPVPPGVTGELYIAGAGLAR | PI synthetase 3 and 4 [ <i>Streptomyces</i><br><i>pristinaespiralis</i> ]                            | CBW45647     |
| AGAAYLPVDPGYPADR      | amino acid adenylation domain-containing protein<br>[ <i>Frankia sp.</i> EAN1pec]                    | YP_001510190 |
| IEPGEIEARLR           | amino acid adenylation domain-containing protein<br>[ <i>Pseudomonas putida</i> GB-1]                | YP_001670309 |
| LVAYVVPAAGSTIDGATLR   | non ribosomal peptide synthase, antibiotic synthesis                                                 | YP_002007886 |
| AAVADLTDR             | non-ribosomal peptide synthetase [ <i>Rhodococcus</i><br><i>erythropolis</i> PR4]                    | YP_002766916 |
| DDVVFGTVTSGR          | nonribosomal peptide synthetase [ <i>Teredinibacter</i><br><i>turnerae</i> T7901]                    | YP_003073479 |
| SADLAAFEHQDLPFER      | non-ribosomal peptide synthetase-like protein<br>[ <i>Streptosporangium roseum</i> DSM 43021]        | YP_003339147 |
| VRSADLAAFEHQDLPFER    | non-ribosomal peptide synthetase-like protein<br>[ <i>Streptosporangium roseum</i> DSM 43021]        | YP_003339147 |
| FVADPYGPPGTR          | non-ribosomal peptide synthetase [ <i>Streptomyces</i><br><i>scabiei</i> 87.22]                      | YP_003486112 |

|                   |                                                                                                      |              |
|-------------------|------------------------------------------------------------------------------------------------------|--------------|
| FVADPFGAPGSR      | non-ribosomal peptide synthetase [ <i>Amycolatopsis mediterranei</i> U32]                            | YP_003765298 |
| LVEILNPAR         | non-ribosomal peptide synthetase [ <i>Rhodococcus equi</i> 103S]                                     | YP_004008264 |
| RPFDLTAESPLR      | amino acid adenylation domain protein [ <i>Frankia sp.</i> Eu11c]                                    | YP_004018396 |
| LYAELDER          | putative non-ribosomal peptide synthetase [ <i>Nocardia farcinica</i> IFM 10152]                     | YP_119006    |
| LPLTSNGK          | amino acid adenylation [ <i>Pseudomonas syringae pv. syringae</i> B728a]                             | YP_234879    |
| VVAVALPR          | amino acid adenylation [ <i>Frankia sp.</i> CcI3]                                                    | YP_481555    |
| FSDFAVWQR         | non-ribosomal peptide synthetase [ <i>Rhodococcus jostii</i> RHA1]                                   | YP_700226    |
| IVALAIPR          | amino acid adenylation domain-containing protein [ <i>Acidovorax avenae subsp. citrulli</i> AAC00-1] | YP_972967    |
| IEPGEIEAVLAR      | amino acid adenylation domain protein [ <i>bacterium Ellin514</i> ]                                  | ZP_03628586  |
| TTALDAYAHQDIPFER  | CDA peptide synthetase I [ <i>Streptomyces roseosporus</i> NRRL 15998]                               | ZP_04691538  |
| FDEANELGR         | PstC protein [ <i>Streptomyces clavuligerus</i> ATCC 27064]                                          | ZP_05003829  |
| TGAAHLPVDPGYPADR  | amino acid adenylation domain protein [ <i>Streptomyces sp.</i> ACT-1]                               | ZP_06276625  |
| LRNGDIEYLGR       | Non-ribosomal peptide synthase [ <i>Cylindrospermopsis raciborskii</i> CS-505]                       | ZP_06307642  |
| GYLGRPGLTSE       | peptide synthetase 3 [ <i>Streptomyces ghanaensis</i> ATCC 14672]                                    | ZP_06575050  |
| VRETDLAAYAHQDLPER | linear gramicidin synthetase LgrD [ <i>Streptomyces griseoflavus</i> Tu4000]                         | ZP_0731401   |

**Supplementary Table 3.** PCR primers used in this work. Primers starting with the same number are reverse translated from the same peptide, and “-F” means forward direction and “-R” means reverse direction. Primers with a “D” are reverse translated using degenerate codons while primers without a “D” are reverse translated using the most likely codons from *Streptomyces coelicolor* A3(2). A3F, A3R, A7F and A7R are degenerate primers for the conserved regions of NRPS A domains.

| NAME | SEQUENCE            | NAME | SEQUENCE             |
|------|---------------------|------|----------------------|
| 1F   | GACATCCCGATCGGCACC  | 1DF  | GAYATCCCSATCGGNAC    |
| 1R   | GGTGCCGATCGGGATGTC  | 1DR  | SGTNCCGATSGGGATRTC   |
| 2R   | GCAGGGCCTCGTGGCG    | 2DR  | CKSAGSGCYTCRTGVCK    |
| 3F   | CGCACTCCGCCATCGTCA  | 3DF  | CSCAYWSSGCSATCGTSAA  |
| 4R   | ACGCCGTCGGCGGTCCA   | 4DR  | ACNCCRTCSGCSGTCCA    |
| 5F   | TACGCCACCAGGACCTGCC | 5DF  | TAYGCSCAYCARGAYCTSCC |

|            |                         |             |                         |
|------------|-------------------------|-------------|-------------------------|
| <b>5R</b>  | GGCAGGTCCTGGTGGGCGTA    | <b>5DR</b>  | GGSAGRTCYTGRTGSGCRTA    |
| <b>6R</b>  | GTGGACGGTGGTGAACCA      | <b>6DR</b>  | RTGSACSGTSGTRAACCA      |
| <b>7R</b>  | GATGTACAGCTCGCCGGTGAC   | <b>7DR</b>  | GCGATRIASAGYTCNCCSGTSAC |
| <b>8F</b>  | CCGGTCGACCCGGGCTAC      | <b>8DF</b>  | TAYCTSCCSGTSGAYCCSG     |
| <b>9R</b>  | CTCGATCTCGCCCGGCTC      | <b>9DR</b>  | GCYTCGATYTCNCCSGGYTC    |
| <b>10R</b> | GGCCGGGACGACGTAGGC      | <b>10DR</b> | SGCSGGSACSACRTASGC      |
| <b>11R</b> | TCGGTCAGGTCGGCGACG      | <b>11DR</b> | TCSGTSAGRTCSCGCSAC      |
| <b>12F</b> | GTCGTCTTCGGCACCGT       | <b>12DF</b> | GTSSTTYGGNACSGT         |
| <b>13F</b> | CTTCGAGCACCAGGACCTGC    | <b>13DF</b> | GCSTTYGARCAYCARGAYCTSC  |
| <b>16F</b> | GTCGAGATCCTGAACCCGGC    | <b>16DF</b> | GTSGARATCCTSAAYCCSGC    |
| <b>17F</b> | CGCCCGTTTCGACCTGAC      | <b>17DF</b> | GBCCSTTYGAYCTSACSGC     |
| <b>18F</b> | ACCTACGCCGAGCTGGACGAG   | <b>18DF</b> | ACSTAYGCSGARCTSGAYGA    |
| <b>19R</b> | TGCCGTTGGAGGTCAGCG      |             |                         |
| <b>20F</b> | GTCGCCGTCGCCCTGCC       | <b>20DF</b> | GTSGCSGTSGCSCTSCC       |
| <b>20R</b> | GGCAGGGCGACGGCGAC       | <b>20DR</b> | GGSAGSGCSACSGCSAC       |
| <b>21F</b> | TCCGACTTCGCCGTCTGG      | <b>21DF</b> | SGAYTTYGCSGTSTGGCA      |
| <b>21R</b> | CCAGACGGCGAAGTCGGA      | <b>21DR</b> | TGCCASACSGCRAARTC       |
| <b>22F</b> | GTCGCCCTGGCCATCCC       | <b>22DF</b> | GTSGCSCTSGCSATCCC       |
| <b>22R</b> | GGGATGGCCAGGGCGAC       | <b>22DR</b> | GGGATSGCSAGSGCSAC       |
| <b>23R</b> | TCGATCTCGCCCGGCTC       | <b>23DR</b> | TCGATYTCNCCSGGYTC       |
| <b>24F</b> | CACCAGGACATCCCGTTCGAG   | <b>24DF</b> | CAYCARGAYATCCCSTTYGA    |
| <b>24R</b> | CTCGAACGGGATGTCCTGGTG   | <b>24DR</b> | TCRAASGGGATRTRCYTGRTG   |
| <b>25F</b> | TTCGACGAGGCCAACGAG      | <b>25DF</b> | TTYGAYGARGCSAAYGARC     |
| <b>25R</b> | CTCGTTGGCCTCGTCGAA      | <b>25DR</b> | GYTCRTTSGCYTCRTCRAA     |
| <b>26F</b> | CCGGTCGACCCGGGCTAC      | <b>26DF</b> | CCSGTSGAYCCSGGNTA       |
| <b>27R</b> | CGGCCCAGGTACTCGAT       |             |                         |
| <b>A3F</b> | GCSTACSYSATSTACACSTCSGG | <b>A3R</b>  | CCSGASGTGTASATSRSGTASGC |
| <b>A7F</b> | STACCGSACSGGBGACSTS     | <b>A7R</b>  | SASGTCVCCSGTSCGGTAS     |

**Supplementary Table 4.** PCR reactions performed to retrieve the DNA sequences of *gob* gene cluster. For each PCR reaction number, two parallel reactions were performed, using primers designed from the degenerate codons and the most likely codons.

| <b>rxn#</b> | <b>Forward Primer</b> | <b>Reverse Primer</b> | <b>rxn#</b> | <b>Forward Primer</b> | <b>Reverse Primer</b> |
|-------------|-----------------------|-----------------------|-------------|-----------------------|-----------------------|
| 1           | A3F                   | 1R                    | 24          | 8F                    | A3R                   |
| 2           | A3F                   | 2R                    | 25          | 12F                   | A3R                   |
| 3           | A3F                   | 5R                    | 26          | 13F                   | A3R                   |
| 4           | A3F                   | 6R                    | 27          | 16F                   | A3R                   |
| 5           | A3F                   | 7R                    | 28          | 17F                   | A3R                   |
| 6           | A3F                   | 19R                   | 29          | 18F                   | A3R                   |
| 7           | A3F                   | 20R                   | 30          | 21F                   | A3R                   |
| 8           | A3F                   | 21R                   | 31          | 24F                   | A3R                   |
| 9           | A3F                   | 23R                   | 32          | 26F                   | A3R                   |

|    |     |     |    |     |     |
|----|-----|-----|----|-----|-----|
| 10 | A3F | 27R | 33 | 1F  | A7R |
| 11 | A7F | 1R  | 34 | 3F  | A7R |
| 12 | A7F | 2R  | 35 | 5F  | A7R |
| 13 | A7F | 5R  | 36 | 8F  | A7R |
| 14 | A7F | 6R  | 37 | 12F | A7R |
| 15 | A7F | 10R | 38 | 13F | A7R |
| 16 | A7F | 11R | 39 | 16F | A7R |
| 17 | A7F | 19R | 40 | 17F | A7R |
| 18 | A7F | 20R | 41 | 18F | A7R |
| 19 | A7F | 21R | 42 | 20F | A7R |
| 20 | A7F | 23R | 43 | 21F | A7R |
| 21 | A7F | 27R | 44 | 24F | A7R |
| 22 | 1F  | A3R | 45 | 26F | A7R |
| 23 | 5F  | A3R |    |     |     |

**Supplementary Table 5.** Sequencing of successful PCR reactions. The most similar homolog is based on BLASTX search result.

| PCR rxn #                   | Most Similar Homolog                                                                             | Length (bp) | Identity/Similarity (%) |
|-----------------------------|--------------------------------------------------------------------------------------------------|-------------|-------------------------|
| Contig of<br>38, 35, 44, 45 | gb AEK43604.1 non-ribosomal peptide synthetase<br>[Amycolatopsis mediterranei S699]              | 1470        | 51/63                   |
| Contig of<br>29 and 41      | ref ZP_08234019.1  amino acid adenylation domain<br>protein [Streptomyces cf. griseus XylebKG-1] | 996         | 63/73                   |
| 37                          | ref YP_004018398.1  amino acid adenylation domain<br>protein [Frankia sp. EuI1c]                 | 707         | 74/81                   |
